# Supplementary material for: Quantitative N-glycoproteomics of milk fat globule membrane in human colostrum and mature milk reveals changes in protein glycosylation during lactation
Source: Royal Society of Chemistry journal article supplement (doi:10.1039/c7fo01796k), 2017-12-29
Supplement: c7fo01796k1.pdf [file c7fo01796k1.pdf]

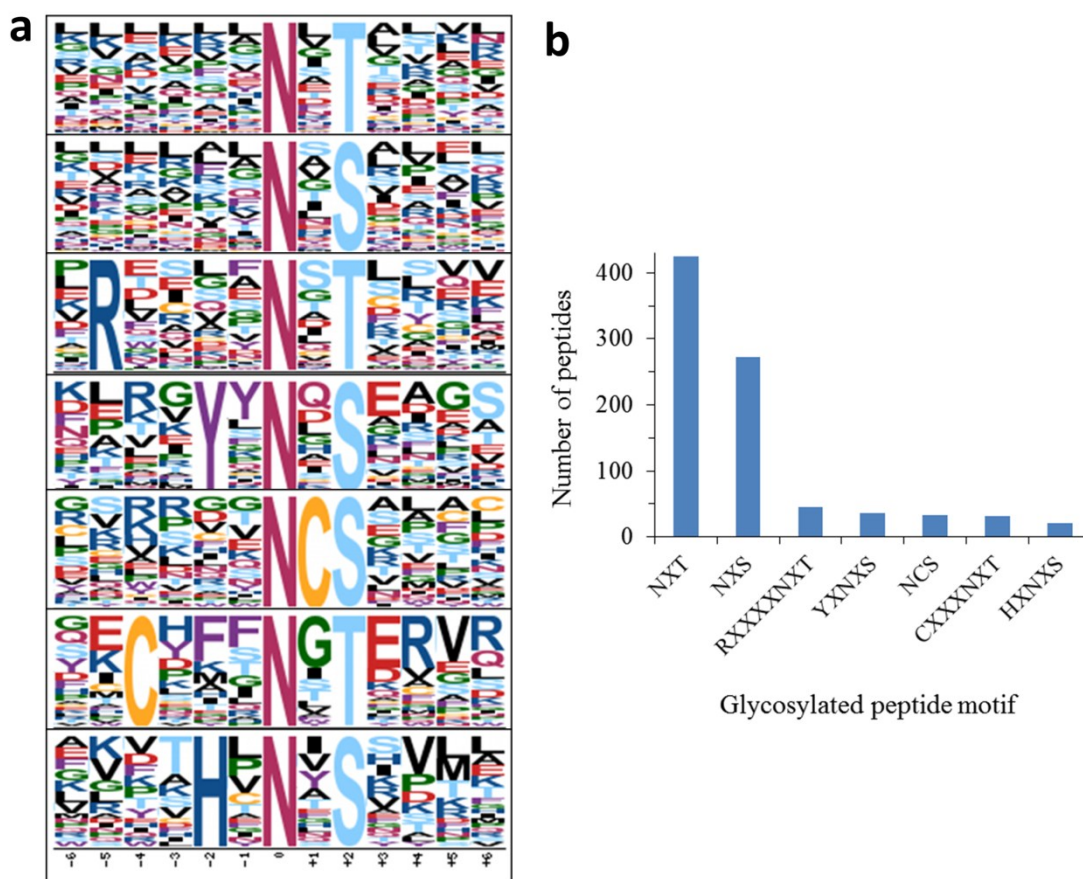

**Figure S1.** N-glycosylation motifs in human colostrum and mature milk. (a) N-glycosylation motifs and conservation of N-glycosylation sites. The height of each letter represents the frequency of amino acid residue in that position. The N refers to the N-glycosylated asparagine. (b) The number of the identified peptides in each motif.

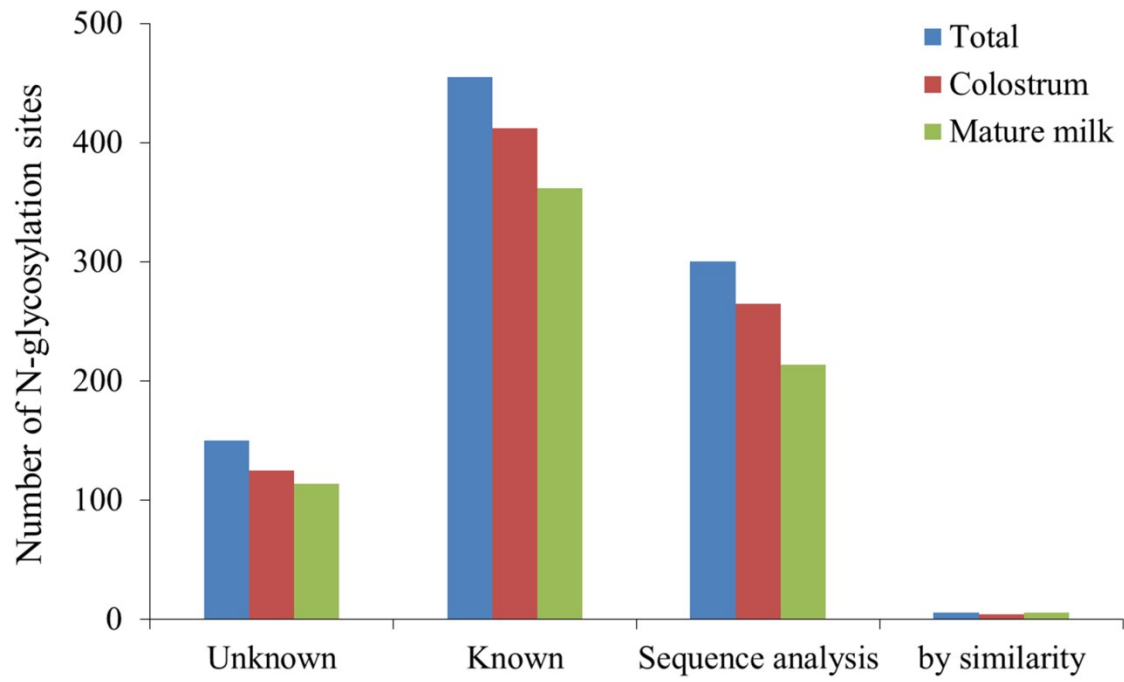

**Figure S2.** Distribution of N-glycosylation sites from human colostrum and mature milk according to the annotation in the UniProt database.
