# Supplementary material for: Quantitative N-glycoproteomics of milk fat globule membrane in human colostrum and mature milk reveals changes in protein glycosylation during lactation
Source: Royal Society of Chemistry journal article supplement (doi:10.1039/c7fo01796k), 2017-12-29
Supplement: c7fo01796k2.xlsx [file c7fo01796k2.xlsx]

## Sheet: Table S1
Table S1. MFGM N-glycoproteins with significantly differentially expressed glycosylation sites (p < 0.05) in human colostrum and mature milk.
Proteins	Description	Positions within proteins	Amino acid	Sequence window	Score	Charge	m/z	Mass error [ppm]	Intensity mature milk 1	Intensity mature milk 2	Intensity mature milk 3	Average mature milk	Intensity colostrum 1	Intensity colostrum 2	Intensity colostrum 3	Average colostrum	colostrum/mature milk	Significance B
P02763	Alpha-1-acid glycoprotein 1	93	N	IFLREYQTRQDQCIYNTTYLNVQRENGTISR	227.47	3	640.3	-0.25332		10464000	8771500	9617750	614410000	674290000	598240000	628980000	65.3978	2.47367e-05
Q6UX09	Olfactomedin-4	411	N	YSTEASTGNMVISKLNDTTLQVLNTWYTKQY	240.2	2	908.461	4.5512	51880000	43476000	39342000	4.48993e+07	2906200000	2584700000	2912500000	2.80113e+09	62.387	3.05253e-05
P24821	tenascin	1093	N	ENLTVTEVGWDGLRLNWTAADQAYEHFIIQV	276.89	3	1040.19	-5.1603	66123000		38533000	52328000	2762200000	2683500000	2919200000	2788300000	53.285	6.07215e-05
Q6UX08	Olfactomedin-4	193	N	GGSSEIVDQLEVEIRNMTLLVEKLETLDKNN	186.25	2	483.757	-0.82582	121630000	32389000	100820000	8.49463e+07	3064900000	4939700000	3434200000	3.81293e+09	44.8864	0.000124807
Q6UX07	Olfactomedin-4	352	N	NMYVNMYNTGNIARVNLTTNTIAVTQTLPNA	277.6	2	1196.62	-0.36364	75234000	63033000	86964000	75077000	3337400000	3065900000	2838400000	3.08057e+09	41.0321	0.000179913
Q92485	Acid sphingomyelinase-like phosphodiesterase 3b	343	N	DRATLSLKDMVTYFMNLSQANAQGTPRWELE	249.16	3	716.331	0.19081	11482000		7581500	9531750	321490000	217200000	262920000	2.67203e+08	28.033	0.000778586
Q30162	HLA-DRB3 protein	19	N	RPRFLEYSTSECHFFNGTERVRFLERYFHNQ	243.13	3	709.639	-0.061543	33357000	29766000	33785000	3.23027e+07	735670000	683720000	659140000	6.92843e+08	21.4485	0.00200509
P98160	Basement membrane-specific heparan sulfate proteoglycan core protein	1755	N	DAGVYICTCRNLHQSNTSRAELLVTEAPSKP	92.428	2	530.257	0.044981	6921300	16172000	56107000	26400100	520520000	473560000	698810000	5.64297e+08	21.3748	0.00202871
P07998	Ribonuclease pancreatic	104	N	EKVTCKNGQGNCYKSNSSMHITDCRLTNGSR	147.96	3	437.517	0.10835	10984000	14753000	6296800	1.06779e+07	301030000	163490000	144840000	203120000	19.0224	0.00299691
P14384	Carboxypeptidase M	38	N	HRQEGMEAFLKTVAQNYSSVTHLHSIGKSVK	198.51	2	922.973	0.98035	24567000	31095000		27831000	469920000	561390000	487560000	506290000	18.1916	0.0034681
O95498	Vascular non-inflammatory molecule 2	411	N	REYWQVCTLLKCKTTNLTTCGRPVETASTRF	74.12	3	623.307	-0.050983	4433400	5896900		5165150	104200000	96194000	51455000	8.39497e+07	16.2531	0.00497105
Q5SU54	HLA class II histocompatibility antigen, DQ beta 1 chain	51	N	__DFVYQFKGMCYFTNGTERVRLVSRSIYNR	107.06	2	677.768	0.58776		8911200	8217800	8564500	132650000	125230000	140140000	1.32673e+08	15.4911	0.00577431
Q6UX06	Olfactomedin-4	136	N	REYVQLISVYEKKLLNLTVRIDIMEKDTISY	162.51	2	416.263	-0.22323	77963000	84959000	129500000	97474000	1886600000	2221000000	351230000	1.48628e+09	15.2479	0.00606352
P05107	Integrin beta-2	212	N	ECQPPFAFRHVLKLTNNSNQFQTEVGKQLIS	124.45	2	791.883	0.86698		22912000	25775000	24343500	321560000	255170000	535430000	370720000	15.2287	0.00608713
P05164	Myeloperoxidase	323	N	DCIPFFRSCPACPGSNITIRNQINALTSFVD	158.25	2	718.331	-0.13409	74387000	46681000	50989000	5.73523e+07	902910000	786840000	926550000	872100000	15.206	0.00611516
P05164	Myeloperoxidase	391	N	LLPFDNLHDDPCLLTNRSARIPCFLAGDTRS	223.5	2	1064.02	0.8167	309310000	124820000	148270000	1.94133e+08	2859100000	2531000000	2736300000	2708800000	13.9533	0.00794087
Q5JTV8	Torsin-1A-interacting protein 1	399	N	EKLWKRSQTFLEKHLNSSHPRSQPAILLLTA	158.07	2	475.738	0.27148		11331000	93037000	52184000	487490000	1307200000	386910000	727200000	13.9353	0.00797164
P13761	HLA class II histocompatibility antigen, DRB1-7 beta chain	48	N	QPRFLWQGKYKCHFFNGTERVQFLERLFYNQ	83.168	3	390.834	-0.32235	47240000	45643000	52820000	4.85677e+07	616710000	558900000	743230000	6.39613e+08	13.1695	0.00942897
P24821	tenascin	1034	N	YSLPTGQWVGVQLPRNTTSYVLRGLEPGQEY	122.13	2	478.75	0.72347	703930000	445290000	444390000	5.31203e+08	5367200000	7749300000	7868600000	6.99503e+09	13.1683	0.00943161
P00734	Prothrombin	143	N	ECQLWRSRYPHKPEINSTTHPGADLQENFCR	175.77	4	679.318	-0.45681	47051000	32496000	63168000	4.75717e+07	324040000	920670000	539860000	5.94857e+08	12.5044	0.0109693
Q16620	BDNF/NT-3 growth factors receptor	178	N	QEAKSSPDTQDLYCLNESSKNIPLANLQIPN	82.707	2	923.898	1.0424	42179000	19083000	83405000	4.82223e+07	810410000	490630000	406630000	5.69223e+08	11.8041	0.0129414
P01871	Ig mu chain C region	272	N	ISWTRQNGEAVKTHTNISESHPNATFSAVGE	126.18	4	881.878	-1.0942	21998000	20017000		21007500	273070000	98554000	247310000	2.06311e+08	9.82084	0.0214874
P24821	tenascin	1485	N	IEIIDSNRLLETVEYNISGAERTAHISGLPP	205.61	2	798.904	-1.2669	456430000	395470000	246930000	3.66277e+08	3313100000	2973100000	4412200000	3.56613e+09	9.73617	0.0219895
Q08431	Lactadherin	165	N	ASHEYLKAFKVAYSLNGHEFDFIHDVNKKHK	179.1	2	1054.5	0.045336	140340000	111050000	169360000	140250000	1371700000	1559800000	1119700000	1350400000	9.62852	0.0226491
P11279	Lysosome-associated membrane glycoprotein 1	249	N	ASMGLQLNLTYERKDNTTVTRLLNINPNKTS	179.37	2	469.245	0.38581	261600000	127960000	527660000	305740000	2284500000	4003100000	1918200000	2.73527e+09	8.94638	0.0274559
P01876	Immunoglobulin heavy constant alpha 1 (IGHA1)	144	N	LHRPALEDLLLGSEANLTCTLTGLRDASGAT;LHRPALEDLLLGSEANLTCTLTGLRDASGVT	294.65	2	1180.62	-0.74482	6723800000	7200600000	7042900000	6989100000	54752000000	65252000000	56047000000	5.86837e+10	8.39646	0.0322901
P36269	Gamma-glutamyltransferase 5	303	N	GGAILSFILNVLRGFNFSTESMARPEGRVNV	138.77	3	568.923	0.5239	19982000	16213000	28522000	2.15723e+07	179100000	203910000	155000000	1.79337e+08	8.31327	0.0331114
Q08431	Lactadherin	228	N	HTACTLRFELLGCELNGCANPLGLKNNSIPD	154.82	3	669.997	-0.62799	231710000	276270000	246290000	2.51423e+08	1981200000	2267600000	1988100000	2.07897e+09	8.26879	0.0335613
P13473	Lysosome-associated membrane glycoprotein 2	275	N	HSTGSCRSHTALLRLNSSTIKYLDFVFAVKN	97.798	2	383.216	0.17156	40942000	46878000	60386000	49402000	389240000	449010000	338670000	3.92307e+08	7.94111	0.0371237
P01011	Alpha-1-antichymotrypsin	271	N	DEELSCTVVELKYTGNASALFILPDQDKMEE	237.46	3	585.961	0.55904	288130000	330470000	289410000	302670000	2444300000	2018400000	2152600000	2205100000	7.28549	0.0457994
Q0R326	MHC class II antigen	48	N	__RFLKQDKFECHFFNGTERVRYLHRGIYNQ;QPRFLKQDKFECHFFNGTERVRYLHRGIYNQ	284.68	2	909.394	0.612	126960000	622980000	137050000	2.95663e+08	1812700000	2076700000	2486500000	2125300000	7.18824	0.0472955
P02787	Serotransferrin	432	N	IAGKCGLVPVLAENYNKSDNCEDTPEAGYFA	73.082	2	740.374	-0.41394	16404000	20874000		18639000	92219000		172300000	132259500	7.09585	0.0487745
Q86SQ4	Adhesion G-protein coupled receptor G6	811	N	QEVHHPICAFWDLNKNKSFGGWNTSGCVAHR	99.891	4	560.776	0.044974	31282000	37185000		34233500		8519600	3536100	6027850	0.17608	0.0497629
Q66K79	Carboxypeptidase Z	57	N	TCVDLQLRTCSDAAYNHTTFPNLLQHRSWEV	269.33	2	1125.02	1.4535	1979700000	1961000000	1733600000	1.89143e+09	246520000	299330000	400690000	3.15513e+08	0.166812	0.043106
Q8NES3	Beta-1,3-N-acetylglucosaminyltransferase lunatic fringe	167	N	EDEALARHTGNVVITNCSAAHSRQALSCKMA	269.51	3	576.277	0.60481	84023000	825570000	523210000	477601000	64018000	68726000	67525000	6.67563e+07	0.139774	0.0263416
Q96JJ7	Protein disulfide-isomerase TMX3	258	N	GDTGKLVALAVIDEKNTSVEHTRLKSIIQEV	153.74	3	666.697	-1.9251	118590000	110940000	144650000	1.24727e+08	20144000	12954000		16549000	0.132682	0.0226328
P51993	Alpha-(1,3)-fucosyltransferase 6	91	N	ALPRCSEMVPGTADCNITADRKVYPQADAVI	121.27	2	1014.44	-0.060662	90061000	61289000	53950000	6.84333e+07	9351600	7198400	10191000	8.91367e+06	0.130253	0.0214306
P01033	Metalloproteinase inhibitor 1	101	N	TPAMESVCGYFHRSHNRSEEFLIAGKLQDGL	110.29	3	497.588	-0.8795	120200000	117480000	109350000	1.15677e+08		15654000	14472000	15063000	0.130216	0.0214127
O15031	Plexin-B2	733	N	SGTFAFRTPKLSHDANETLPLHLYVKSYGKN	140.46	3	618.328	0.051541	223460000	241050000	215270000	2.26593e+08	40825000	20795000	25784000	2.91347e+07	0.128577	0.0206213
Q969X2	Alpha-N-acetylgalactosaminide alpha-2,6-sialyltransferase 6	173	N	HSSVFRVLRRPQEFVNRTPETVFIFWGPPSK	117.4	2	524.775	-0.099015	53679000	85271000	107210000	8.20533e+07	6884600	13068000	11029000	10327200	0.12586	0.0193448
P05154	Plasma serine protease inhibitor	249	N	PMMSREDQYHYLLDRNLSCRVVGVPYQGNAT	215.93	2	992.957	1.5449	373680000	426570000	394670000	3.98307e+08	37697000	48781000	51152000	4.58767e+07	0.115179	0.014755
Q9UHD0	Interleukin-19	135	N	QCQEQRQCHCRQEATNATRVIHDNYDQLEVH	156.01	2	447.214	-0.18788	913480000	1208100000	2896300000	1.67263e+09	240230000	293170000	12502000	1.81967e+08	0.108791	0.0123365
P06213	Insulin receptor	445	N	LDNQNLRQLWDWSKHNLTITQGKLFFHYNPK	160.53	2	507.777	-0.013696	29456000	74583000	66345000	5.67947e+07	3832500		8311300	6071900	0.10691	0.0116706
Q9BYF1	Angiotensin-converting enzyme 2	546	N	QAAKHEGPLHKCDISNSTEAGQKLFNMLRLG	127.56	2	656.782	0.52235	119510000	102630000	90445000	104195000	10617000	10742000	9791200	10383400	0.0996535	0.00929988
O00391	Sulfhydryl oxidase 1	575	N	AAPELAMGALELESRNSTLDPGKPEMMKSPT	112.08	2	733.841	0.28868	65416000	90717000	82256000	79463000		5925400	5697700	5811550	0.0731353	0.00319795
Q5T601	Adhesion G-protein coupled receptor F1	168	N	WGTFKINERFTNDLLNSSSAIYSKYANGIEI	147.7	2	831.909	0.24245	266240000	324540000	228160000	272980000	20971000	16759000	17397000	1.83757e+07	0.0673151	0.00235711
P09758	Tumor-associated calcium signal transducer 2	168	N	HILIDLRHRPTAGAFNHSDLDAELRRLFRER	200.6	5	434.02	-0.55221	202330000	165470000	121910000	1.63237e+08	4376600	16242000		10309300	0.0631555	0.00185392
P02751	Fibronectin	542	N	VNDTFHKRHEEGHMLNCTCFGQGRGRWKCDP	238.83	3	703.296	-0.3776	1124000000	1217700000	883630000	1075110000	67406000	94206000	20328000	6.06467e+07	0.0564097	0.00119758
P27169	Serum paraoxonase/arylesterase 1	253	N	AELLAHKIHVYEKHANWTLTPLKSLDFNTLV	201.48	2	592.321	0.96665	409820000	410730000	291850000	370800000	14845000	26004000		20424500	0.0550823	0.00109009
P22079	Lactoperoxidase	358	N	YLPYDSKKPSPCEFINTTARVPCFLAGDSRA	117.2	2	762.374	0.2776	870650000	791090000	844220000	835320000	41872000	39483000	32608000	3.79877e+07	0.0454768	0.000499111
P22897	Macrophage mannose receptor 1	1205	N	CVYLDLDGYWKTAHCNESFYFLCKRSDEIPA	199.31	2	840.358	1.8565	1047900000	1143000000	996940000	1.06261e+09	12834000	50303000	27579000	3.02387e+07	0.0284569	6.14016e-05

## Sheet: Table S2
Table S2. MFGM N-glycoproteins with exclusively expressed glycosylation sites in human colostrum and mature milk.
Protein	Description	Positions within proteins	Amino acid	Sequence window	Score	Charge	m/z	Mass error [ppm]	Intensity mature milk 1	Intensity mature milk 2	Intensity mature milk 3	Intensity colostrum 1	Intensity colostrum 2	Intensity colostrum 3
P82987	ADAMTS-like protein 3	927	N	KRINLTIGSRAYLLPNTSVIIKCPVRRFQKS	77.593	2	667.894	0.0039021	18450000	15285000	19025000	0	0	0
O00206	Adhesion G protein-coupled receptor E2	173	N	AHNLIQSFKLPEYFSNLTNLEHLDLSSNKIQ	187.43	3	779.721	1.4064	45662000	0	53261000	0	0	0
Q5T601	Adhesion G-protein coupled receptor F1	455	N	QLKRGYSYQIKMCPQNTSIPIRGRVLIGSDQ	120.06	2	668.318	1.1304	76312000	88918000	99900000	0	0	0
Q7Z6M3	Allergin-1	89	N	THLGTQDGKGEPAIFNLSITEAHESGPYKCK	69.922	3	721.688	0.47079	0	22391000	14690000	0	0	0
P51993	Alpha-(1,3)-fucosyltransferase 6	153	N	SPSHCWQLKAMDGYFNLTMSYRSDSDIFTPY	75.669	2	802.336	-0.14339	0	25566000	20712000	0	0	0
P35475	Alpha-L-iduronidase	372	N	PHTFAQRTLTARFQVNNTRPPHVQLLRKPVL	82.55	4	456.255	-0.48986	0	26695000	8947300	0	0	0
Q9BYF1	Angiotensin-converting enzyme 2	90	N	EQSTLAQMYPLQEIQNLTVKLQLQALQQNGS	129.77	2	1169.1	2.475	49738000	0	45526000	0	0	0
Q9Y5Q5	Atrial natriuretic peptide-converting enzyme	245	N	VNYSWPDFLRCSQFRNQTESSNVSRICFSPQ	123.79	2	562.757	-1.0478	11506000	11516000	0	0	0	0
Q9GZN4	Brain-specific serine protease 4	70	N	DSTDSEWPWIVSIQKNGTHHCAGSLLTSRWV	105.31	3	505.24	1.5516	29034000	14856000	12651000	0	0	0
Q9UBX1	Cathepsin F	378	N	MQSCNFSAEKAKVYINDSVELSQNEQKLAAW	124.62	2	884.928	0.78817	23446000	9980300	9559800	0	0	0
P27701	CD82 antigen	129	N	KQEMGGIVTELIRDYNSSREDSLQDAWDYVQ	143.95	3	874.061	-1.2479	0	37008000	45997000	0	0	0
Q3MIR4	Cell cycle control protein 50B	273	N	ALPTFRKLYARIRQGNYSAGLPRGAYRVNIT	66.056	2	533.264	-0.041705	94906000	42471000	35084000	0	0	0
P43121	Cell surface glycoprotein MUC18	449	N	AFKERKVWVKENMVLNLSCEASGHPRPTISW	105.31	3	606.278	0.086341	12874000	0	9889700	0	0	0
P02745	Complement C1q subcomponent subunit A	146	N	VIFDTVITNQEEPYQNHSGRFVCTVPGYYYF	62.848	3	1044.82	-0.0052916	0	28421000	40679000	0	0	0
P05156	Complement factor I	177	N	GADTQRRFKLSDLSINSTECLHVHCRGLETS	101.2	3	681.987	0.51148	47099000	33865000	9502300	0	0	0
P16444	Dipeptidase 1	279	N	MVNFYNNYISCTNKANLSQVADHLDHIKEVA	142.74	2	782.404	-0.024474	183590000	174790000	179990000	0	0	0
P16444	Dipeptidase 1	57	N	QLLDMFNNRLQDERANLTTLAGTHTNIPKLR	132.65	2	777.922	0.92679	100100000	102000000	70795000	0	0	0
P52799	Dipeptidyl peptidase 1	36	N	RTAISKSIVLEPIYWNSSNSKFLPGQGLVLY	96.993	2	870.44	1.2343	9088300	0	8312400	0	0	0
Q9NZ08	Endoplasmic reticulum aminopeptidase 1	414	N	YFFGKCFDAMEVDALNSSHPVSTPVENPAQI	178.58	3	996.463	0.072486	74635000	34747000	55261000	0	0	0
Q9NPA0	ER membrane protein complex subunit 7	184	N	MVLPLLIFVLLPKVVNTSDPDMRREMEQSMN	86.898	2	568.761	-0.07635	0	10961000	7740400	0	0	0
A8K737	Fucosyltransferase	154	N	PPPNCQHLEALDRYFNLTMSYRSDSDIFTPY	79.148	2	607.276	0.55037	15464000	21450000	15854000	0	0	0
A8K737	Fucosyltransferase	185	N	GWLEPWSGQPAHPPLNLSAKTELVAWAVSNW	107.58	3	1071.85	0.39894	34020000	0	39845000	0	0	0
Q08380	Galectin-3-binding protein	192	N	TANLEAQALWKEPGSNVTMSVDAECVPMVRD	129.15	2	1048.96	0.77537	73078000	106880000	131510000	0	0	0
Q4G148	Glucoside xylosyltransferase 1	237	N	FLRPVDDIWSLLKKFNSTQIAAMAPEHEEPR	63.374	3	686.998	0.64925	16549000	10776000	14936000	0	0	0
P04062	Glucosylceramidase	185	N	RTYTYADTPDDFQLHNFSLPEEDTKLKIPLI	190.88	3	950.755	0.18817	78852000	62451000	73973000	0	0	0
P09466	Glycodelin	81	N	PTPEDNLEIVLHRWENNSCVEKKVLGEKTEN	78.098	2	584.745	-0.679	40948000	47035000	44852000	0	0	0
Q68CQ7	Glycosyltransferase 8 domain-containing protein 1	257	N	NPGVFVANLTEWKRQNITNQLEKWMKLNVEE	135.43	2	545.785	0.27412	0	13649000	7914600	0	0	0
Q68CP4	Heparan-alpha-glucosaminide N-acetyltransferase	461	N	GYLGPGGIGDFGKYPNCTGGAAGYIDRLLLG	81.632	2	759.332	0.11843	3815300	0	6007100	0	0	0
P04196	Histidine-rich glycoprotein	125	N	TRHSHESQDLRVIDFNCTTSSVSSALANTKD	125.51	2	1009.49	0.7522	55972000	51274000	38753000	0	0	0
P04196	Histidine-rich glycoprotein	344	N	HATFGTNGAQRHSHNNNSSDLHPHKHHSHEQ	96.464	4	407.437	0.68425	0	2932700	14369000	0	0	0
P30492	HLA class I histocompatibility antigen, B-54 alpha chain	110	N	TQTYRESLRNLRGYYNQSEAGSHTWQTMYGC	112.88	3	985.073	-0.70179	27675000	35501000	0	0	0	0
P01880	Immunoglobulin heavy constant delta (IGHD)	367	N	TYTCVVSHEDSRTLLNASRSLEVSCESPPGP	134.06	2	389.221	-0.058385	17487000	18316000	18183000	0	0	0
Q969P0	Immunoglobulin superfamily member 8	463	N	AGGTVYRGETASLLCNISVRGGPPGLRLAAS	107.14	2	711.861	-0.18477	19695000	17185000	21809000	0	0	0
Q13308	Inactive tyrosine-protein kinase 7	116	N	CVARDDVTGEEARSANASFNIKWIEAGPVVL	105.36	2	477.742	-0.086049	10733000	24898000	0	0	0	0
P14778	Interleukin-1 receptor type 1	193	N	KDRLIVMNVAEKHRGNYTCHASYTYLGKQYP	73.156	3	546.577	0.90664	5680500	5919300	6441300	0	0	0
Q92876	Kallikrein-6	134	N	SELIQPLPLERDCSANTTSCHILGWGKTADG	104.94	2	905.393	0.046075	22535000	15392000	16591000	0	0	0
P29622	Kallistatin	157	N	ALFLSHNLKFLAKFLNDTMAVYEAKLFHTNF	102.97	2	710.831	-0.035221	15544000	16604000	15723000	0	0	0
O43291	Kunitz-type protease inhibitor 2	94	N	LTKEECLKKCATVTENATGDLATSRNAADSS	139.6	2	835.383	-0.28462	17580000	18977000	16058000	0	0	0
P02788	Lactoferrin	534	N	RSNLCALCIGDEQGENKCVPNSNERYYGYTG	170.47	2	905.895	1.0656	35253000	23532000	21370000	0	0	0
Q16787	Laminin subunit alpha-3	2751	N	GCMKNLKKTSGVVRLNDTVGVTKKCSEDWKL	74.533	2	475.258	0.064692	10672000	17585000	0	0	0	0
Q16787	Laminin subunit alpha-3	2265	N	QTLNIVTVQKEVIDTNLTTLRDGLHGIQRGD	113.63	2	639.345	0.51238	22116000	16004000	14613000	0	0	0
P55268	Laminin subunit beta-2	1348	N	IRHAHSQSAEAERRANTSALAVPSPVSNSAS	50.226	3	653.676	1.4664	28019000	41313000	5623300	0	0	0
Q9NS15	Latent-transforming growth factor beta-binding protein 3	349	N	RGEVGADCPQGYKRLNSTHCQDINECAMPGV	91.401	3	760.983	-0.71946	11052000	0	17686000	0	0	0
Q8N2S1	Latent-transforming growth factor beta-binding protein 4	352	N	VSAPDGPCPTGFERVNGSCEDVDECATGGRC	109.35	2	864.838	0.87491	8784800	0	8737900	0	0	0
Q8TBP5	Membrane protein FAM174A	83	N	RGLAEAAGPRGSEGGNGSNPVAGLETDDHGG	105.96	2	1029.45	-0.094851	53502000	48485000	45440000	0	0	0
C5J400	MHC class I antigen	110	N	TQTDRESLRNLRGYYNQSEAGSHTLQSMYGC	117.82	3	956.729	-0.2365	54336000	73223000	72797000	0	0	0
D7RIG7	MHC class II antigen	48	N	RPRFLEYSTGECYFFNGTERVRFLDRYFYNQ	180.7	2	1061.95	-0.00098017	74063000	44571000	55510000	0	0	0
P55083	Microfibril-associated glycoprotein 4	137	N	LKQKYELRVDLEDFENNTAYAKYADFSISPN	159.58	2	816.37	-0.033962	36458000	75377000	40792000	0	0	0
P20138	Myeloid cell surface antigen CD33	100	N	ETQGRFRLLGDPSRNNCSLSIVDARRRDNGS	91.313	2	626.298	0.16846	56636000	41158000	56233000	0	0	0
P20138	Myeloid cell surface antigen CD33	99	N	EETQGRFRLLGDPSRNNCSLSIVDARRRDNG	91.313	2	626.298	0.16846	56636000	41158000	56233000	0	0	0
P20138	Myeloid cell surface antigen CD33	209	N	SSVLIITPRPQDHGTNLTCQVKFAGAGVTTE	127.71	3	936.152	0.3863	43430000	70059000	38547000	0	0	0
Q68D85	Natural cytotoxicity triggering receptor 3 ligand 1	242	N	QCVVRHASLHTPLRSNFTLTAARHSLSETEK	76.282	2	492.256	-0.16813	0	14480000	14140000	0	0	0
Q9Y639	Neuroplastin	171	N	VIIRDSPVLPVTLQCNLTSSSHTLTYSYWTK	151.66	3	1034.51	-0.022539	87297000	0	85670000	0	0	0
Q15758	Neutral amino acid transporter B(0)	212	N	VSAAFRSYSTTYEERNITGTRVKVPVGQEVE	95.428	3	594.279	-0.77861	89024000	108050000	84914000	0	0	0
Q9Y680	Peptidyl-prolyl cis-trans isomerase FKBP7	45	N	ESTEEVKIEVLHRPENCSKTSKKGDLLNAHY	59.898	3	495.585	0.052153	12376000	15459000	7483600	0	0	0
P03952	Plasma kallikrein	494	N	EGNHDIALIKLQAPLNYTEFQKPICLPSKGD	93.684	3	750.729	-0.11549	6654400	9570700	10113000	0	0	0
P05154	Plasma serine protease inhibitor	262	N	DRNLSCRVVGVPYQGNATALFILPSEGKMQQ	79.467	3	721.724	1.1788	75277000	0	60342000	0	0	0
Q15198	Platelet-derived growth factor receptor-like protein	219	N	KVTLHREFPAKEIPANGTDIVYDMKRGFVYL	106.13	2	792.871	1.2139	16872000	29993000	52187000	0	0	0
Q9Y4D7	Plexin-D1	155	N	CGSIYQGFCQLRRRGNISAVAVRFPPAAPPA	60.828	2	523.304	-0.18627	12445000	8911700	0	0	0	0
Q96SM3	Probable carboxypeptidase X1	318	N	KAMRKLMKQVQEQCPNITRIYSIGKSYQGLK	57.164	2	688.33	-1.0892	5675300	9902300	8958000	0	0	0
P01133	Pro-epidermal growth factor	148	N	SNQQEGIITVTDMKGNNSHILLSALKYPANV	160.84	2	635.356	-0.7114	82846000	72571000	68246000	0	0	0
Q32P28	Prolyl 3-hydroxylase 1	540	N	GQEGKVPLQSAHLYYNVTEKVRRIMESYFRL	104.45	3	588.973	-0.82568	15007000	22839000	17897000	0	0	0
Q6P4E1	Protein CASC4	150	N	QEFLRQEDQLQDYRKNNTYLVKRLEYESFQC	128.38	2	491.776	0.082179	31835000	63705000	29382000	0	0	0
A2RU67	Protein FAM234B	396	N	SDGVELLQMVKAPDSNCSNLLITTRQSLVLL	130.27	2	782.88	0.70448	19257000	18376000	19398000	0	0	0
Q5VW38	Protein GPR107	169	N	LGQSQEPNVNPASAGNQTQKTQDGGKSKRST	141.74	2	1085.53	0.26683	26107000	38085000	0	0	0	0
O94903	Pyridoxal phosphate homeostasis protein	146	N	QRKGSPERLKVMVQINTSGEESKHGLPPSET	64.65	2	712.845	3.9046	30449000	33173000	42758000	0	0	0
Q8WTV0	Scavenger receptor class B member 1	102	N	RERGPYVYREFRHKSNITFNNNDTVSFLEYR	70.907	4	577.027	-0.45798	12978000	0	10802000	0	0	0
Q8WTV0	Scavenger receptor class B member 1	108	N	VYREFRHKSNITFNNNDTVSFLEYRTFQFQP	70.907	4	577.027	-0.4411	12978000	0	10802000	0	0	0
Q99985	Semaphorin-3C	585	N	KAYRNAAEIVQYGVKNNTTFLECAPKSPQAS	63.944	2	649.303	-0.21675	0	12912000	10682000	0	0	0
Q99985	Semaphorin-3C	586	N	AYRNAAEIVQYGVKNNTTFLECAPKSPQASI	63.944	2	649.303	-0.21675	0	12912000	10682000	0	0	0
P37173	TGF-beta receptor type-2	94	N	KPQEVCVAVWRKNDENITLETVCHDPKLPYH	55.094	3	639.303	1.2783	13804000	18794000	8485400	0	0	0
P43307	Translocon-associated protein subunit alpha	191	N	NYKDLNGNVFQDAVFNQTVTVIEREDGLDGE	116.21	3	794.732	-1.944	2292900	0	1652400	0	0	0
Q5T4D3	Transmembrane and TPR repeat-containing protein 4	497	N	AKVHYNIGKNLADKGNQTAAIRYYREAVRLN	147.18	2	687.865	-1.1678	15269000	15048000	8187100	0	0	0
Q96K49	Transmembrane protein 87B	68	N	VNDKSGPLIFRKTMFNSTDIKLSVKSFHCSG	60.102	2	530.249	0.14712	20159000	27116000	18409000	0	0	0
Q9HCN3	Transmembrane protein 8A	535	N	SCSCKAGWRGWSCTDNSTAQTVAQQRAATLL	121.19	2	956.921	0.72499	8945800	7590100	0	0	0	0
P04070	Vitamin K-dependent protein C	290	N	KWELDLDIKEVFVHPNYSKSTTDNDIALLHL	63.415	3	408.204	0.092106	8138500	10176000	10576000	0	0	0
A0A0K0KRB6	MHC class I antigen	85	N	AQADRVSLRNLRGYYNQSENGSHTLQRMYGC	47.532	2	878.892	0.043138	0	0	0	0	12975000	10209000
P08575	Receptor-type tyrosine-protein phosphatase C	529	N	ERYHLEVEAGNTLVRNESHKNCDFRVKDLQY	141	3	700.352	-0.7965	0	0	0	0	26287000	10840000
P08238	Heat shock protein HSP 90-beta	46	N	SLYKNKEIFLRELISNASDALDKIRLISLTD;TFYSNKEIFLRELISNASDALDKIRYESLTD	90.926	2	639.819	0.50549	0	0	0	0	15192000	11082000
O75882	Attractin	1198	N	VATPDEQNRDLDMFINASKNFNLNITWAASF	90.685	2	578.776	0.48043	0	0	0	0	16687000	15427000
Q07954	Prolow-density lipoprotein receptor-related protein 1	3839	N	DINECLRFGTCSQLCNNTKGGHLCSCARNFM	205.12	2	716.808	-0.13543	0	0	0	0	27252000	16113000
Q99572	P2X purinoceptor 7	284	N	CHPKYSFRRLDDKTTNVSLYPGYNFRYAKYY	59.185	2	767.875	2.1262	0	0	0	0	16531000	20264000
P08575	Receptor-type tyrosine-protein phosphatase C	335	N	CLKWKNIETFTCDTQNITYRFQCGNMIFDNK	40.187	2	939.925	-0.14033	0	0	0	0	31015000	29211000
Q9UIU0	Dihydropyridine receptor alpha 2 subunit	682	N	FIAPRDYCNDLKISDNNTEFLLNFNEFIDRK	172.6	2	1102.52	-0.45096	0	0	0	0	43450000	34591000
P01871	Ig mu chain C region	279	N	GEAVKTHTNISESHPNATFSAVGEASICEDD	126.18	4	881.878	-1.0942	0	0	0	0	58433000	38924000
P02787	Serotransferrin	630	N	CVHKILRQQQHLFGSNVTDCSGNFCLFRSET	50.117	3	840.042	-2.6425	0	0	0	0	90248000	86149000
O75943	Cell cycle checkpoint protein RAD17	310	N	MMKFLNRIVTIEANKNGGKITVPDKTSLELL	70.028	2	516.285	0.20895	0	0	0	0	927820000	759400000
P08582	Melanotransferrin	135	N	TIDTLKGVKSCHTGINRTVGWNVPVGYLVES	122.19	2	474.216	0.24575	0	0	0	0	76512000	26828000000
O75071	EF-hand calcium-binding domain-containing protein 14	347	N	DRSATLKRQSLDQVTNRTDTVKIQSIKKEDS	66.056	2	532.267	0.0058232	0	0	0	2421600	3502800	3138600
Q9NRJ3	C-C motif chemokine 28	78	N	VILHVKRRRICVSPHNHTVKQWMKVQAAKKN	96.113	2	647.827	1.1306	0	0	0	2988500	6738800	7961300
O00292	Left-right determination factor 2	158	N	ARVTVEWLRVRDDGSNRTSLIDSRLVSVHES	108.98	3	307.814	-0.020753	0	0	0	3141900	0	3412800
Q6EMK4	Vasorin	117	N	LSNLDLTANRLHEITNETFRGLRRLERLYLG	98.249	3	421.547	-0.91933	0	0	0	3724900	0	4786200
Q16363	Laminin subunit alpha-4	104	N	NECLDGSGYCVHCQRNTTGEHCEKCLDGYIG	82.287	2	539.721	0.1233	0	0	0	4397600	0	4938100
P19634	Sodium/hydrogen exchanger 1	75	N	VTTAPPEVTPESRPVNHSVTDHGMKPRKAFP	67.275	3	526.596	0.17664	0	0	0	4449000	7644300	3393200
Q9NQ36	Signal peptide, CUB and EGF-like domain-containing protein 2	761	N	QDCETRVQCSPGHFYNTTTHRCIRCPVGTYQ	46.319	3	603.274	1.2143	0	0	0	4983200	0	9462400
P16671	Platelet glycoprotein 4 CD 36	247	N	GKRNLSYWESHCDMINGTDAASFPPFVEKSQ	195.09	3	1059.81	0.2554	0	0	0	5173400	14695000	5603100
Q4KMQ2	Anoctamin-6	802	N	DFKNKSKGNPYSDLGNHTTCRYRDFRYPPGH	88.73	2	797.844	0.95537	0	0	0	5353600	0	6430300
Q9Y487	V-type proton ATPase 116 kDa subunit a isoform 2	505	N	SSSHPPAEHKKMVLWNDSVVRHNSILQLDPS	60.434	2	611.313	0.056755	0	0	0	5389800	9099000	0
Q5VX71	Sushi domain-containing protein 4	134	N	QEDCRIPQIEDAEIHNKTYRHGEKLIITCHE	68.809	3	470.577	5.1371	0	0	0	5598300	0	3828800
Q7YPT7	MHC class II antigen	51	N	PEDFVYQFKGLCYFTNGTERVRGVTRHIYNR	70.412	2	660.792	0.32082	0	0	0	5712500	0	29934000
Q9NR97	Toll-like receptor 8	42	N	EENFSRSYPCDEKKQNDSVIAECSNRRLQEV	75.483	3	508.572	0.11407	0	0	0	5892400	5583100	3431400
Q7Z4F1	Low-density lipoprotein receptor-related protein 10	299	N	VVSYHTVAWSNGRGFNATYHVRGYCLPWDRP	80.239	3	356.51	-0.02504	0	0	0	5926200	5873000	3586500
P78536	Disintegrin and metalloproteinase domain-containing protein 17	539	N	NCQFETAQKKCQEAINATCKGVSYCTGNSSE	84.687	2	599.26	-0.86025	0	0	0	6136200	5646800	0
Q5T4D3	Transmembrane and TPR repeat-containing protein 4	78	N	GDLWHHDFWGSRLSSNTSHKSYRPLTVLTFR	109.21	2	438.719	0.59536	0	0	0	6293800	6385500	7445200
Q5QGZ9	C-type lectin domain family 12 member A	80	N	HVTLKIEMKKMNKLQNISEELQRNISLQLMS	83.862	2	616.822	1.9134	0	0	0	6487500	5410800	8482200
P05362	Intercellular adhesion molecule 1	145	N	NLTLRCQVEGGAPRANLTVVLLRGEKELKRE	140.75	2	501.316	0.061372	0	0	0	6541200	4476300	7419700
Q07954	Prolow-density lipoprotein receptor-related protein 1	2127	N	DRTHANGSIKRGSKDNATDSVPLRTGIGVQL	65.5	2	545.767	1.2683	0	0	0	6720000	8121800	5015600
P02788	Lactoferrin	198	N	GQFPNLCRLCAGTGENKCAFSSQEPYFSYSG	80.231	2	476.718	-0.0011831	0	0	0	7027600	7682200	16357000
Q07954	Prolow-density lipoprotein receptor-related protein 1	3953	N	SNRHRRQIDRGVTHLNISGLKMPRGIAIDWV	109.72	3	381.22	-0.36805	0	0	0	7090100	0	7384800
P78536	Disintegrin and metalloproteinase domain-containing protein 17	174	N	TKDKRMLVYKSEDIKNVSRLQSPKVCGYLKV	112.36	2	525.769	0.269	0	0	0	7108200	8903800	8630200
Q07954	Prolow-density lipoprotein receptor-related protein 1	4364	N	EGACVVNKQSGDVTCNCTDGRVAPSCLTCVG	49.929	2	736.785	0.032189	0	0	0	7378500	5709400	5032300
Q9UGT4	Sushi domain-containing protein 2	494	N	TDLRVQARAQPGTMSNGTETRGTGLTAVAVQ	57.804	2	676.803	0.29895	0	0	0	7768000	13402000	9637900
P07942	Laminin subunit beta-1	677	N	RYVVLPRPVCFEKGTNYTVRLELPQYTSSDS	104.45	2	407.203	0.24772	0	0	0	8121700	9849300	7189000
Q9Y5G2	Protocadherin gamma-B2	545	N	LTLQARDQGSPALSANVSLRVLVGDLNDNAP	116.96	2	709.362	-0.81083	0	0	0	8355200	10125000	0
Q86SQ4	Adhesion G-protein coupled receptor G6	667	N	EALKTIDELAFKIDLNSTSHVNITTRNLALS	84.566	2	788.901	-1.9594	0	0	0	8898300	32892000	0
Q99574	Neuroserpin	321	N	VLKALGITEIFIKDANLTGLSDNKEIFLSKA	93.753	2	575.777	-0.60723	0	0	0	9133100	12236000	0
Q86VB7	Scavenger receptor cysteine-rich type 1 protein M130	1001	N	QGTGPIWLNEVKCKGNESSLWDCPARRWGHS	86.288	2	697.798	0.76131	0	0	0	9205500	14496000	12082000
Q7Z7D3	V-set domain-containing T-cell activation inhibitor 1	112	N	FRGRTAVFADQVIVGNASLRLKNVQLTDAGT	129.05	2	832.449	1.3036	0	0	0	9436400	0	4964700
Q07954	Prolow-density lipoprotein receptor-related protein 1	3333	N	PTNFYLGSDGRTCVSNCTASQFVCKNDKCIP	107.46	2	832.852	0.98116	0	0	0	9722700	0	18006000
Q07954	Prolow-density lipoprotein receptor-related protein 1	114	N	MDGSDEGPHCRELQGNCSRLGCQHHCVPTLD	80.684	2	483.713	-0.74956	0	0	0	9744200	8529600	20243000
O00584	Ribonuclease T2	212	N	GQIELCLTKQDQQLQNCTEPGEQPSPKQEVW	129.32	2	1043.97	-1.2665	0	0	0	9955300	4996800	0
Q02413	Desmoglein-1	110	N	PPYGIFVINQKTGEINITSIVDREVTPFFII	109.22	2	660.848	0.70318	0	0	0	10128000	8896000	8534700
Q12913	Receptor-type tyrosine-protein phosphatase eta	142	N	AVSISPTNVILTWKSNDTAASEYKYVVKHKM	137.17	2	544.735	0.086113	0	0	0	10797000	57141000	20332000
P58499	Protein FAM3B	208	N	AKGLELPSEIQREKINHSDAKNNRYSGWPAE	132.32	2	394.195	0.19661	0	0	0	10900000	0	8117200
Q9HC84	Mucin-5B	5096	N	SHYSTFDGTSYTFRGNCTYVLMREIHARFGN	78.934	2	558.757	0.35938	0	0	0	10963000	11485000	12542000
P08473	Neprilysin	145	N	IVAVQKAKALYRSCINESAIDSRGGEPLLKL	72.089	2	627.779	-0.19622	0	0	0	11004000	11422000	9656500
Q9NXH8	Torsin-4A	314	N	LSGAGGAEVTRFVLQNASRALPLRPDGFRSA	107.01	2	469.253	-0.12453	0	0	0	11118000	18607000	2124900
P16278	Beta-galactosidase	464	N	GIPQGVLERNNVITLNITGKAGATLDLLVEN	72.958	2	595.337	-0.46545	0	0	0	11609000	13946000	0
P06280	Alpha-galactosidase A	192	N	LENLADGYKHMSLALNRTGRSIVYSCEWPLY	101.33	2	472.747	0.28452	0	0	0	11641000	19382000	12852000
Q3T906	N-acetylglucosamine-1-phosphotransferase subunits alpha/beta	684	N	IPKEKRFPKFKRHDVNSTRRAQEEVKIPLVN	133.9	3	329.833	0.057415	0	0	0	11857000	8978300	10595000
P06865	Beta-hexosaminidase subunit alpha	157	N	FSQLVWKSAEGTFFINKTEIEDFPRFPHRGL	73.067	2	558.777	-0.2484	0	0	0	11885000	12912000	17489000
Q12913	Receptor-type tyrosine-protein phosphatase eta	937	N	GSYRCLLRACVAGFTNITFHPQNKGLIDGAE	44.252	3	603.294	0.4989	0	0	0	11951000	11075000	0
Q86VB7	Scavenger receptor cysteine-rich type 1 protein M130	140	N	SALWDCKHDGWGKHSNCTHQQDAGVTCSDGS	86.557	4	652.518	0.40473	0	0	0	12040000	12670000	0
A0A140EDI1	MHC class II antigen	109	N	IAILNNNLNTLIQRSNHTQAANDPPEVTMFP	51.166	3	662.975	0.45079	0	0	0	12102000	0	21301000
Q86VB7	Scavenger receptor cysteine-rich type 1 protein M130	123	N	AGSGRIWMDHVSCRGNESALWDCKHDGWGKH	57.019	2	591.753	-0.47145	0	0	0	12304000	0	9729400
P36941	Tumor necrosis factor receptor superfamily member 3	177	N	KGNNHCVPCKAGHFQNTSSPSARCQPHTRCE	67.997	3	454.881	-0.022987	0	0	0	12318000	16675000	20106000
A0A0K0KRB6	MHC class I antigen	89	N	RVSLRNLRGYYNQSENGSHTLQRMYGCDLGP	47.532	2	878.892	0.49727	0	0	0	12757000	12975000	10209000
P30825	High affinity cationic amino acid transporter 1	226	N	KGSVKNWQLTEEDFGNTSGRLCLNNDTKEGK	154.6	2	878.887	0.31527	0	0	0	13605000	21216000	14699000
P55083	Microfibril-associated glycoprotein 4	87	N	MTTEGGKWTVFQKRFNGSVSFFRGWNDYKLG	188.66	2	532.258	-0.34187	0	0	0	14143000	27740000	27174000
Q07954	Prolow-density lipoprotein receptor-related protein 1	3788	N	EEDCSIDPKLTSCATNASICGDEARCVRTEK	75.463	2	864.874	-0.067819	0	0	0	14190000	15660000	14655000
P17927	Complement receptor type 1	897	N	HTGKPLEVFPFGKAVNYTCDPHPDRGTSFDL	68.44	3	483.21	-0.15342	0	0	0	14375000	12091000	4709600
Q93091	Ribonuclease K6	100	N	CKNRRHNCHQSSKPVNMTDCRLTSGKYPQCR	60.019	2	498.212	-0.11161	0	0	0	14821000	22537000	30309000
P08962	CD63 antigen	172	N	IPSMSKNRVPDSCCINVTVGCGINFNEKAIH	99.11	3	852.722	-1.0389	0	0	0	15454000	0	42146000
P08842	Steryl-sulfatase	459	N	HYCNAYLNAVRWHPQNSTSIWKAFFFTPNFN	53.08	2	693.838	-0.46288	0	0	0	15639000	10443000	0
A0A140EDI1	MHC class II antigen	149	N	NTLICHIDRFFPPVLNVTWLCNGEPVTEGVA	66.012	3	1097.89	-2.0572	0	0	0	15808000	110070000	68066000
P23229	Integrin alpha-6	997	N	GLDSKASLILRSRLWNSTFLEEYSKLNYLDI	126.1	2	760.364	-0.16834	0	0	0	16342000	0	19078000
Q99571	P2X purinoceptor 4	153	N	GTHSNGVSTGRCVAFNGSVKTCEVAAWCPVE	70.028	2	492.739	0.12134	0	0	0	16817000	11015000	17279000
Q29882	HLA-DQA1 protein	103	N	IAVLKHNLNIVIKRSNSTAATNEVPEVTVFS	117.55	2	942.46	-1.1807	0	0	0	17730000	43520000	0
P11215	Integrin alpha-M	978	N	RSLPISLVFLVPVRLNQTVIWDRPQVTFSEN	65.213	4	741.866	1.2497	0	0	0	17756000	18525000	0
Q8NBN3	Transmembrane protein 87A	127	N	RGLSGKYQTSSKLFQNCSELFKTQTFSGDFM	55.401	2	644.81	-0.0029029	0	0	0	18022000	20445000	18157000
Q5KU26	Collectin-12	271	N	DWLKEKVQSLQTLAANNSALAKANNDTLEDM	125.52	2	816.446	0.31276	0	0	0	18538000	18669000	12215000
Q9NRA1	Platelet-derived growth factor C	254	N	NLLTEEVRLYSCTPRNFSVSIREELKRTDTI	111.04	2	413.221	0.038056	0	0	0	18594000	20215000	23524000
P05107	Integrin beta-2	642	N	SCAECLKFEKGPFGKNCSAACPGLQLSNNPV	144.33	2	916.929	-0.073826	0	0	0	18894000	19791000	17514000
Q13641	Trophoblast glycoprotein	81	N	CECSEAARTVKCVNRNLTEVPTDLPAYVRNL	104.17	2	795.917	0.56561	0	0	0	18987000	0	20627000
O15389	Sialic acid-binding Ig-like lectin 5	375	N	APSLCWRLEEKPLEGNSSQGSFKVNSSSAGP	78.932	2	876.93	-0.16264	0	0	0	19213000	23427000	13275000
P17927	Complement receptor type 1	578	N	GMVHVITDIQVGSRINYSCTTGHRLIGHSSA	177.06	3	404.517	-0.22324	0	0	0	19571000	13961000	19346000
P13726	Tissue factor	169	N	KVNVTVEDERTLVRRNNTFLSLRDVFGKDLI	96.171	2	562.309	-0.94746	0	0	0	19678000	19090000	0
O60602	Toll-like receptor 5	37	N	PSCSFDGRIAFYRFCNLTQVPQVLNTTERLL	133.71	2	963.474	0.90167	0	0	0	20334000	22993000	13332000
O60602	Toll-like receptor 5	46	N	AFYRFCNLTQVPQVLNTTERLLLSFNYIRTV	133.71	2	963.474	0.90167	0	0	0	20334000	22993000	13332000
P20827	Ephrin-A1	26	N	LCCSLAAADRHTVFWNSSNPKFRNEDYTIHV	103.46	2	660.317	1.3072	0	0	0	22280000	45472000	25269000
O60449	Lymphocyte antigen 75	1076	N	ALILNLQKSPFTGTWNFTSCSERHFVSLCQK	204.28	2	890.38	-1.9548	0	0	0	23209000	41698000	30132000
P40199	Carcinoembryonic antigen-related cell adhesion molecule 6	224	N	DAGSYECEIQNPASANRSDPVTLNVLYGPDG	183.74	2	999.921	0.36194	0	0	0	23336000	156920000	160010000
P09326	CD48 antigen	104	N	PQSGALYISKVQKEDNSTYIMRVLKKTGNEQ	102.87	2	743.858	-1.2686	0	0	0	23530000	10170000	30030000
O43490	Prominin-1	220	N	LNETPEQIKYILAQYNTTKDKAFTDLNSINS	81.017	2	609.319	0.25755	0	0	0	23606000	19451000	19507000
P08575	Receptor-type tyrosine-protein phosphatase C	419	N	HQGVITWNPPQRSFHNFTLCYIKETEKDCLN	114.72	2	716.844	-0.43261	0	0	0	23869000	20267000	15628000
Q10588	ADP-ribosyl cyclase/cyclic ADP-ribose hydrolase 2	66	N	RNSREPPVLHTTQNKNCTAIWEAFKVALDKD	121.76	2	742.858	0.88539	0	0	0	24040000	36951000	54659000
O95084	Serine protease 23	93	N	YEEAKQYLSYETLYANGSRTETQVGIYILSS	82.102	2	834.394	0.5387	0	0	0	24515000	19659000	23397000
Q99572	P2X purinoceptor 7	202	N	NFTVLIKNNIDFPGHNYTTRNILPGLNITCT	114.87	2	776.357	2.5447	0	0	0	24873000	20923000	48301000
Q99102	Mucin-4	1949	N	QLLLSEEENASMAEVNASVAYRLGTLDMRAF	136.64	3	881.438	-1.0054	0	0	0	25499000	73953000	0
P20702	Integrin alpha-X	939	N	VYTVVSSHEQFTKYLNFSESEEKESHVAMHR	83.397	2	624.779	-0.039446	0	0	0	25717000	19035000	18379000
O60449	Lymphocyte antigen 75	934	N	PTDCSTKLPFICEKYNVSSLEKYSPDSAAKV	87.639	2	471.737	-0.15739	0	0	0	25886000	23102000	14299000
P79499	HLA-DRB1 antigen	4	N	____________HFFNGTERVQFLDRYFHNQ	115.49	2	505.732	0.50142	0	0	0	26055000	30789000	18765000
P78325	Disintegrin and metalloproteinase domain-containing protein 8	612	N	CWKGRCQDLHVYRSSNCSAQCHNHGVCNHKQ	136.17	3	667.265	-0.73799	0	0	0	26702000	0	29971000
P19652	Alpha-1-acid glycoprotein 2	93	N	IFLREYQTRQNQCFYNSSYLNVQRENGTVSR	146.47	2	962.431	-4.5031	0	0	0	26845000	25547000	34207000
Q07954	Prolow-density lipoprotein receptor-related protein 1	446	N	ANAQQKTSVIRVNRFNSTEYQVVTRVDKGGA	99.5	2	673.827	-0.019741	0	0	0	26934000	14407000	13323000
Q96RQ9	L-amino-acid oxidase	134	N	SSHRILHKLCQGLGLNLTKFTQYDKNTWTEV	78.903	2	610.334	-0.23758	0	0	0	27252000	21477000	21005000
Q92911	Sodium/iodide cotransporter	225	N	VMLVGGPRQVLTLAQNHSRINLMDFNPDPRS	100.69	2	635.343	1.1332	0	0	0	27552000	24404000	13762000
Q8N353	TMEM106B protein	223	N	QVQFSKTVIGKARLNNISIIGPLDMKQIDYT	121.56	2	715.894	0.60108	0	0	0	28267000	22601000	30896000
Q07954	Prolow-density lipoprotein receptor-related protein 1	2117	N	SVFEDFIYWSDRTHANGSIKRGSKDNATDSV	67.113	2	415.716	0.41205	0	0	0	28362000	53155000	22459000
P20701	Integrin alpha-L	862	N	ELPEESRLLSRALSCNVSSPIFKAGHSVALQ	72.089	2	663.336	0.38586	0	0	0	30332000	22239000	24570000
Q9UIQ6	Leucyl-cystinyl aminopeptidase	682	N	KYQSVSLLDKKSGVINLTEEVLWVKVNINMN	108.71	2	795.437	1.5174	0	0	0	30384000	29913000	32467000
Q07954	Prolow-density lipoprotein receptor-related protein 1	2521	N	RGGRILQDDLTCRAVNSSCRAQDEFECANGE	148.07	2	398.679	0.5323	0	0	0	31162000	41169000	38791000
P32942	Intercellular adhesion molecule 3	295	N	ATARADQEGAREIVCNVTLGGERREARENLT	93.623	2	675.334	0.8232	0	0	0	31207000	31044000	20306000
Q9ULL4	Plexin-B3	51	N	PPPLPLTGAHRFSAPNTTLNHLALAPGRGTL	105.31	3	594.984	-2.7452	0	0	0	31493000	26963000	0
Q9Y644	Beta-1,3-N-acetylglucosaminyltransferase radical fringe	113	N	DPELELQGGDRVINTNCSAVRTRQALCCKMS	97.456	2	568.784	-0.51826	0	0	0	31658000	0	18812000
P07711	Cathepsin L1	221	N	ATEESCKYNPKYSVANDTGFVDIPKQEKALM	97.797	2	764.874	0.78498	0	0	0	31792000	39266000	43104000
O60449	Lymphocyte antigen 75	135	N	RYRLALKDGHGTAISNASDVWKKGGSEESLC	177.88	3	520.911	-0.60338	0	0	0	32068000	31053000	27523000
P98160	Basement membrane-specific heparan sulfate proteoglycan core protein	3780	N	SLTQGSLIVGDLAPVNGTSQGKFQGLDLNEE	139.28	2	1073.07	0.08058	0	0	0	32732000	31049000	30824000
Q9UIQ6	Leucyl-cystinyl aminopeptidase	184	N	PTAVVPLRYELSLHPNLTSMTFRGSVTISVQ	101.36	3	604.634	0.72663	0	0	0	32745000	28837000	0
P01920	HLA class II histocompatibility antigen, DQ beta 1 chain	51	N	PEDFVYQFKAMCYFTNGTERVRYVTRYIYNR	73.781	2	676.778	-0.15907	0	0	0	32747000	31640000	25976000
O60449	Lymphocyte antigen 75	865	N	ITSFVGLKAIKNKIANISGDGQKWWIRISEW	127.4	2	503.258	0.20536	0	0	0	33397000	26007000	25174000
P28799	Granulins	236	N	CCELPSGKYGCCPMPNATCCSDHLHCCPQDT	54.324	4	947.624	-1.0271	0	0	0	33713000	53436000	48429000
P20702	Integrin alpha-X	899	N	VSPKAVLGDRLLLTANVSSENNTPRTSKTTF	130.66	2	816.428	-0.24689	0	0	0	34547000	34049000	36933000
Q13641	Trophoblast glycoprotein	124	N	GAFARRPPLAELAALNLSGSRLDEVRAGAFE	89.913	2	834.47	-1.5168	0	0	0	35511000	31028000	31909000
P21757	Macrophage scavenger receptor types I and II	249	N	VHLEQEIKGEVKVLNNITNDLRLKDWEHSQT	139.43	2	587.819	-0.36047	0	0	0	36447000	61222000	27394000
P35555	Fibrillin-1	1902	N	TMCLDINECERDACGNGTCRNTIGSFNCRCN	113.71	2	507.187	0.19537	0	0	0	36583000	0	30749000
Q4KMQ2	Anoctamin-6	361	N	IMCPQCDRLCPFWKLNITCESSKKLCIFDSF	94.409	2	527.752	-0.90754	0	0	0	37810000	35947000	0
P79550	MHC class II HLA-DR-beta	11	N	_____EYSTSECHFFNGTERVRFLERYFHNQ	194.55	3	622.921	0.66621	0	0	0	38560000	76475000	60560000
P00450	Ceruloplasmin	762	N	PQREWEKELHHLQEQNVSNAFLDKGEFYIGS	222.3	2	1013	-0.33417	0	0	0	40122000	34172000	12644000
O60449	Lymphocyte antigen 75	1642	N	KSKSGVGRCSMLIASNETWKKVECEHGFGRV	148.18	2	721.831	0.99587	0	0	0	40173000	31119000	50030000
P19652	Alpha-1-acid glycoprotein 2	103	N	NQCFYNSSYLNVQRENGTVSRYEGGREHVAH	86.794	2	383.185	0.47846	0	0	0	40459000	67205000	31950000
Q10588	ADP-ribosyl cyclase/cyclic ADP-ribose hydrolase 2	192	N	IQYSKDSSGVIHVMLNGSEPTGAYPIKGFFA	133.38	2	1138.06	0.10065	0	0	0	40897000	63383000	45065000
P25311	Zinc-alpha-2-glycoprotein	112	N	FMETLKDIVEYYNDSNGSHVLQGRFGCEIEN	243.09	3	691.316	-0.66441	0	0	0	40979000	26989000	91772000
O00468	Agrin	135	N	APPYLWPAHKNELMLNSSLMRITLRNLEEVE	152.85	2	655.82	0.12802	0	0	0	41367000	26733000	35002000
Q99571	P2X purinoceptor 4	184	N	DDTHVPQPAFLKAAENFTLLVKNNIWYPKFN	77.379	2	554.81	0.59516	0	0	0	42286000	33557000	34490000
P15144	Aminopeptidase N	681	N	FNLASAHKVPVTLALNNTLFLIEERQYMPWE	162.41	2	973.048	0.38467	0	0	0	42790000	38372000	36449000
P07998	Ribonuclease pancreatic	62	N	PSSSSTYCNQMMRRRNMTQGRCKPVNTFVHE	157.33	2	433.213	0.56946	0	0	0	43196000	0	31996000
P05107	Integrin beta-2	501	N	QGRSSQELEGSCRKDNNSIICSGLGDCVCGQ	127.66	4	814.353	-0.26627	0	0	0	44281000	47907000	50944000
Q99571	P2X purinoceptor 4	208	N	IWYPKFNFSKRNILPNITTTYLKSCIYDAKT	73.466	2	697.395	0.06747	0	0	0	44565000	36204000	32665000
P20160	Azurocidin	126	N	QNLNDLMLLQLDREANLTSSVTILPLPLQNA	158.2	2	1301.19	1.5692	0	0	0	48570000	60468000	44406000
P20160	Azurocidin	140	N	ANLTSSVTILPLPLQNATVEAGTRCQVAGWG	158.2	2	1301.19	1.5692	0	0	0	48570000	60468000	44406000
P00450	Ceruloplasmin	397	N	IWNYAPSGIDIFTKENLTAPGSDSAVFFEQG	115.46	2	1065.5	0.37706	0	0	0	49092000	36118000	43317000
Q99571	P2X purinoceptor 4	75	N	VVSSVTTKVKGVAVTNTSKLGFRIWDVADYV	84.213	2	440.237	0.46736	0	0	0	50328000	0	36061000
Q30065	MHC class II HLA-DQ-alpha chain	81	N	MAVAKHNLNIMIKRYNSTAATNEVPEVTVFS	111.65	2	980.475	0.61826	0	0	0	51785000	62735000	57452000
Q86VB7	Scavenger receptor cysteine-rich type 1 protein M130	105	N	NQLGCPTAIKAPGWANSSAGSGRIWMDHVSC	71.933	2	610.781	-0.082281	0	0	0	53167000	54806000	44836000
P02786	Transferrin receptor protein 1	727	N	LLENLKLRKQNNGAFNETLFRNQLALATWTI	82.543	2	707.336	0.33533	0	0	0	53211000	28147000	18965000
Q9UHX3	Adhesion G protein-coupled receptor E2	111	N	CSPGYEPVSGAKTFKNESENTCQDVDECQQN	153.06	3	868.027	-0.11401	0	0	0	53972000	48746000	34472000
W0UUR6	Ribonuclease A F1	119	N	RVPLLHCDLINPGAQNISNCRYADRPGRRFY	92.993	3	765.38	-0.55464	0	0	0	56272000	32567000	20012000
P00738	Haptoglobin	184	N	AKGSFPWQAKMVSHHNLTTGATLINEQWLLT	192.47	3	894.798	2.3216	0	0	0	58227000	131170000	137450000
P11215	Integrin alpha-M	940	N	VYMVVTSHGVSTKYLNFTASENTSRVMQHQY	111.79	2	704.822	-0.046988	0	0	0	58514000	70772000	73389000
P11215	Integrin alpha-M	946	N	SHGVSTKYLNFTASENTSRVMQHQYQVSNLG	111.79	2	704.822	-0.046988	0	0	0	58514000	70772000	73389000
Q9UGT4	Sushi domain-containing protein 2	162	N	VHPNKVSMMEKSELVNETRWQYYGTANTSGN	114.5	2	475.737	-0.49261	0	0	0	63442000	35866000	31141000
Q07954	Prolow-density lipoprotein receptor-related protein 1	1511	N	WRTNTLAKANKWTGHNVTVVQRTNTQPFDLQ	68.44	2	650.338	0.25729	0	0	0	64482000	52262000	56191000
Q7YQB2	MHC class I antigen	110	N	AQADRVNLRNLRGYYNQSEDGSHTFQRMYGC	211.82	3	597.92	0.10409	0	0	0	66422000	80553000	68381000
P04003	C4b-binding protein alpha chain	528	N	SGYGVVGPQSITCSGNRTWYPEVPKCEWETP	60.876	4	995.209	0.52746	0	0	0	76440000	99438000	81025000
P04003	C4b-binding protein alpha chain	506	N	NGRLSVDKDQYVEPENVTIQCDSGYGVVGPQ	60.876	4	995.209	0.52746	0	0	0	76440000	99438000	101160000
P14384	Carboxypeptidase M	164	N	QYDLNRNFPDAFEYNNVSRQPETVAVMKWLK	69.258	2	788.352	-0.61547	0	0	0	78720000	34670000	39197000
P14384	Carboxypeptidase M	384	N	HDPHITKVIIPEKSQNFSALKKDILLPFQGQ	133.98	2	513.279	-0.51312	0	0	0	81574000	87093000	89118000
P11215	Integrin alpha-M	391	N	GGVFLYTSKEKSTFINMTRVDSDMNDAYLGY	122.19	2	494.736	-0.22917	0	0	0	88352000	31269000	63732000
Q9GZM7	Tubulointerstitial nephritis antigen-like	161	N	MIKAINQGNYGWQAGNHSAFWGMTLDEGIRY	164.79	3	999.459	-0.48892	0	0	0	98898000	66464000	76544000
P04839	Cytochrome b-245 heavy chain	240	N	ERIVRGQTAESLAVHNITVCEQKISEWGKIK	247.91	2	994.486	0.73591	0	0	0	105360000	29023000	37437000
P05107	Integrin beta-2	50	N	ECIESGPGCTWCQKLNFTGPGDPDSIRCDTR	155.08	2	696.338	0.44318	0	0	0	105530000	134260000	135580000
P05164	Myeloperoxidase	729	N	KNNIFMSNSYPRDFVNCSTLPALNLASWREA	135.28	2	983.982	-1.4297	0	0	0	110370000	103920000	128350000
P08246	Neutrophil elastase	88	N	ANVNVRAVRVVLGAHNLSRREPTRQVFAVQR	89.171	2	534.806	0.85114	0	0	0	111450000	85756000	72434000
Q15399	Toll-like receptor 1	163	N	TTHLEKSSVLPIAHLNISKVLLVLGETYGEK	73.927	3	461.269	-0.62516	0	0	0	111480000	88984000	91027000
Q99102	Mucin-4	1525	N	QWLLEPHDAIRVLLDNQTVTFQPDHEDGGGQ	186.17	3	1155.56	0.48869	0	0	0	122370000	146790000	110510000
Q99102	Mucin-4	1544	N	TFQPDHEDGGGQETFNATGVLLSRNGSEVSA	186.17	3	1155.56	0.48869	0	0	0	122370000	146790000	110510000
P12273	Prolactin-inducible protein	105	N	LCDDNPKTFYWDFYTNRTVQIAAVVDVIREL	151.83	2	708.311	0.12653	0	0	0	126540000	128670000	131260000
P34810	Macrosialin	279	N	LRDLQAPLGQSFSCSNSSIILSPAVHLDLLS	152.65	3	1114.58	0.58997	0	0	0	128310000	126800000	108150000
P11117	Lysosomal acid phosphatase	92	N	WELGQALRQRYHGFLNTSYHRQEVYVRSTDF	132.88	2	699.328	0.66933	0	0	0	134690000	63586000	94585000
P49788	Retinoic acid receptor responder protein 1	142	N	SARVFFKNQKPRPTINVTCTRLIEKKKRQQE	125.71	2	532.768	0.37001	0	0	0	153190000	131900000	53771000
P31997	Carcinoembryonic antigen-related cell adhesion molecule 8	288	N	VNGTFQQYTQKLFIPNITTKNSGSYACHTTN	89.886	2	525.31	-0.19483	0	0	0	179070000	189770000	204220000
P02763	Alpha-1-acid glycoprotein 1	103	N	DQCIYNTTYLNVQRENGTISRYVGGQEHFAH	98.299	2	390.193	-0.27898	0	0	0	196650000	140270000	105620000
P08246	Neutrophil elastase	173	N	LLGRNRGIASVLQELNVTVVTSLCRRSNVCT	271.82	2	1031.56	0.23979	0	0	0	206300000	184960000	142620000
P31997	Carcinoembryonic antigen-related cell adhesion molecule 8	104	N	ITPGPAYSNRETIYPNASLLMRNVTRNDTGS	129.84	2	705.863	-0.17946	0	0	0	216050000	213340000	221540000
Q9UBV2	Protein sel-1 homolog 1	217	N	QKREAYRYLQKAASMNHTKALERVSYALLFG	125.31	2	431.702	-0.31205	0	0	0	225350000	164300000	156820000
P11215	Integrin alpha-M	1021	N	SHSDFLAELRKAPVVNCSIAVCQRIQCDIPF	184.31	2	802.91	-0.13931	0	0	0	345190000	361600000	320370000
P12821	Angiotensin-converting enzyme	146	N	NLPLAKRQQYNALLSNMSRIYSTAKVCLPNK	110.64	2	714.345	0.98976	0	0	0	383540000	346270000	432430000
P01859	Immunoglobulin heavy constant gamma 2 (IGHG2)	176	N	VEVHNAKTKPREEQFNSTFRVVSVLTVLHQD	129.38	2	580.759	0.21818	0	0	0	436190000	657560000	646580000
P00734	Prothrombin	121	N	GNCAEGLGTNYRGHVNITRSGIECQLWRSRY	127.12	2	400.219	0.33498	0	0	0	681380000	508920000	844210000
Q6UX06	Olfactomedin-4	72	N	SRSLGSGGSVSQLFSNFTGSVDDRGTCQCSV	234.04	2	1110.52	0.17957	0	0	0	774330000	849680000	1272300000
P24821	tenascin	1366	N	GDLAVSEVGWDGLRLNWTAADNAYEHFVIQV	266.74	2	1296.63	-0.14821	0	0	0	2624900000	1858800000	1696400000
P01903	HLA class II histocompatibility antigen, DR alpha chain	143	N	NVLICFIDKFTPPVVNVTWLRNGKPVTTGVS	161.93	3	477.934	0.34965	0	0	0	4091500000	3850300000	4794400000

## Sheet: Table S3
Table S3. MFGM differentially expressed N-glycoproteins related to acute inflammatory response.
Proteins	Description	Positions within proteins	Amino acid	Sequence window	Score	Charge	m/z	Mass error [ppm]	Intensity mature milk 1	Intensity mature milk 2	Intensity mature milk 3	Intensity colostrum 1	Intensity colostrum 2	Intensity colostrum 3
P02763	Alpha-1-acid glycoprotein 1	93	N	IFLREYQTRQDQCIYNTTYLNVQRENGTISR	227.47	3	640.3	-0.25332		10464000	8771500	614410000	674290000	598240000
P02763	Alpha-1-acid glycoprotein 1	103	N	DQCIYNTTYLNVQRENGTISRYVGGQEHFAH	98.299	2	390.193	-0.27898	0	0	0	196650000	140270000	105620000
P17927	Complement receptor type 1	897	N	HTGKPLEVFPFGKAVNYTCDPHPDRGTSFDL	68.44	3	483.21	-0.15342	0	0	0	14375000	12091000	4709600
P17927	Complement receptor type 1	578	N	GMVHVITDIQVGSRINYSCTTGHRLIGHSSA	177.06	3	404.517	-0.22324	0	0	0	19571000	13961000	19346000
P02751	Fibronectin	542	N	VNDTFHKRHEEGHMLNCTCFGQGRGRWKCDP	238.83	3	703.296	-0.3776	1124000000	1217700000	883630000	67406000	94206000	20328000
P78325	Disintegrin and metalloproteinase domain-containing protein 8	612	N	CWKGRCQDLHVYRSSNCSAQCHNHGVCNHKQ	136.17	3	667.265	-0.73799	0	0	0	26702000	0	29971000
P04003	C4b-binding protein alpha chain	506	N	NGRLSVDKDQYVEPENVTIQCDSGYGVVGPQ	60.876	4	995.209	0.52746	0	0	0	76440000	99438000	101160000
P04003	C4b-binding protein alpha chain	528	N	SGYGVVGPQSITCSGNRTWYPEVPKCEWETP	60.876	4	995.209	0.52746	0	0	0	76440000	99438000	81025000
P05362	Intercellular adhesion molecule 1	145	N	NLTLRCQVEGGAPRANLTVVLLRGEKELKRE	140.75	2	501.316	0.061372	0	0	0	6541200	4476300	7419700
Q5VX71	Sushi domain-containing protein 4	134	N	QEDCRIPQIEDAEIHNKTYRHGEKLIITCHE	68.809	3	470.577	5.1371	0	0	0	5598300	0	3828800
P19652	Alpha-1-acid glycoprotein 2	103	N	NQCFYNSSYLNVQRENGTVSRYEGGREHVAH	86.794	2	383.185	0.47846	0	0	0	40459000	67205000	31950000
P19652	Alpha-1-acid glycoprotein 2	93	N	IFLREYQTRQNQCFYNSSYLNVQRENGTVSR	146.47	2	962.431	-4.5031	0	0	0	26845000	25547000	34207000
P01011	Alpha-1-antichymotrypsin	271	N	DEELSCTVVELKYTGNASALFILPDQDKMEE	237.46	3	585.961	0.55904	288130000	330470000	289410000	2444300000	2018400000	2152600000
Q4KMQ2	Anoctamin-6	802	N	DFKNKSKGNPYSDLGNHTTCRYRDFRYPPGH	88.73	2	797.844	0.95537	0	0	0	5353600	0	6430300
Q4KMQ2	Anoctamin-6	361	N	IMCPQCDRLCPFWKLNITCESSKKLCIFDSF	94.409	2	527.752	-0.90754	0	0	0	37810000	35947000	0
P08246	Neutrophil elastase	173	N	LLGRNRGIASVLQELNVTVVTSLCRRSNVCT	271.82	2	1031.56	0.23979	0	0	0	206300000	184960000	142620000
P08246	Neutrophil elastase	88	N	ANVNVRAVRVVLGAHNLSRREPTRQVFAVQR	89.171	2	534.806	0.85114	0	0	0	111450000	85756000	72434000
P05156	Complement factor I	177	N	GADTQRRFKLSDLSINSTECLHVHCRGLETS	101.2	3	681.987	0.51148	47099000	33865000	9502300	0	0	0
Q86VB7	Scavenger receptor cysteine-rich type 1 protein M130	105	N	NQLGCPTAIKAPGWANSSAGSGRIWMDHVSC	71.933	2	610.781	-0.082281	0	0	0	53167000	54806000	44836000
Q86VB7	Scavenger receptor cysteine-rich type 1 protein M130	140	N	SALWDCKHDGWGKHSNCTHQQDAGVTCSDGS	86.557	4	652.518	0.40473	0	0	0	12040000	12670000	0
Q86VB7	Scavenger receptor cysteine-rich type 1 protein M130	123	N	AGSGRIWMDHVSCRGNESALWDCKHDGWGKH	57.019	2	591.753	-0.47145	0	0	0	12304000	0	9729400
Q86VB7	Scavenger receptor cysteine-rich type 1 protein M130	1001	N	QGTGPIWLNEVKCKGNESSLWDCPARRWGHS	86.288	2	697.798	0.76131	0	0	0	9205500	14496000	12082000
P13726	Tissue factor	169	N	KVNVTVEDERTLVRRNNTFLSLRDVFGKDLI	96.171	2	562.309	-0.94746	0	0	0	19678000	19090000	0
P00738	Haptoglobin	184	N	AKGSFPWQAKMVSHHNLTTGATLINEQWLLT	192.47	3	894.798	2.3216	0	0	0	58227000	131170000	137450000
P03952	Plasma kallikrein	494	N	EGNHDIALIKLQAPLNYTEFQKPICLPSKGD	93.684	3	750.729	-0.11549	6654400	9570700	10113000	0	0	0
P00734	Prothrombin	121	N	GNCAEGLGTNYRGHVNITRSGIECQLWRSRY	127.12	2	400.219	0.33498	0	0	0	681380000	508920000	844210000
P00734	Prothrombin	143	N	ECQLWRSRYPHKPEINSTTHPGADLQENFCR	175.77	4	679.318	-0.45681	47051000	32496000	63168000	324040000	920670000	539860000

## Sheet: Table S4
Table S4. MFGM differentially expressed N-glycoproteins involved in phagosome pathways.
Proteins	Description	Positions within proteins	Amino acid	Sequence window	Score	Charge	m/z	Mass error [ppm]	Intensity mature milk 1	Intensity mature milk 2	Intensity mature milk 3	Intensity colostrum 1	Intensity colostrum 2	Intensity colostrum 3
A0A0K0KRB6	MHC class I antigen	85	N	AQADRVSLRNLRGYYNQSENGSHTLQRMYGC	47.532	2	878.892	0.043138	0	0	0	0	12975000	10209000
A0A0K0KRB6	MHC class I antigen	89	N	RVSLRNLRGYYNQSENGSHTLQRMYGCDLGP	47.532	2	878.892	0.49727	0	0	0	12757000	12975000	10209000
A0A140EDI1	MHC class II antigen	109	N	IAILNNNLNTLIQRSNHTQAANDPPEVTMFP	51.166	3	662.975	0.45079	0	0	0	12102000	0	21301000
A0A140EDI1	MHC class II antigen	149	N	NTLICHIDRFFPPVLNVTWLCNGEPVTEGVA	66.012	3	1097.89	-2.0572	0	0	0	15808000	110070000	68066000
C5J400	MHC class I antigen	110	N	TQTDRESLRNLRGYYNQSEAGSHTLQSMYGC	117.82	3	956.729	-0.2365	54336000	73223000	72797000	0	0	0
D7RIG7	MHC class II antigen	48	N	RPRFLEYSTGECYFFNGTERVRFLDRYFYNQ	180.7	2	1061.95	-0.00098017	74063000	44571000	55510000	0	0	0
O00206	Adhesion G protein-coupled receptor E2	173	N	AHNLIQSFKLPEYFSNLTNLEHLDLSSNKIQ	187.43	3	779.721	1.4064	45662000	0	53261000	0	0	0
P01903	HLA class II histocompatibility antigen, DR alpha chain	143	N	NVLICFIDKFTPPVVNVTWLRNGKPVTTGVS	161.93	3	477.934	0.34965	0	0	0	4091500000	3850300000	4794400000
P01920	HLA class II histocompatibility antigen, DQ beta 1 chain	51	N	PEDFVYQFKAMCYFTNGTERVRYVTRYIYNR	73.781	2	676.778	-0.15907	0	0	0	32747000	31640000	25976000
P02786	Transferrin receptor protein 1	727	N	LLENLKLRKQNNGAFNETLFRNQLALATWTI	82.543	2	707.336	0.33533	0	0	0	53211000	28147000	18965000
P04839	Cytochrome b-245 heavy chain	240	N	ERIVRGQTAESLAVHNITVCEQKISEWGKIK	247.91	2	994.486	0.73591	0	0	0	105360000	29023000	37437000
P05107	Integrin beta-2	212	N	ECQPPFAFRHVLKLTNNSNQFQTEVGKQLIS	124.45	2	791.883	0.86698		22912000	25775000	321560000	255170000	535430000
P05107	Integrin beta-2	501	N	QGRSSQELEGSCRKDNNSIICSGLGDCVCGQ	127.66	4	814.353	-0.26627	0	0	0	44281000	47907000	50944000
P05107	Integrin beta-2	642	N	SCAECLKFEKGPFGKNCSAACPGLQLSNNPV	144.33	2	916.929	-0.073826	0	0	0	18894000	19791000	17514000
P05107	Integrin beta-2	50	N	ECIESGPGCTWCQKLNFTGPGDPDSIRCDTR	155.08	2	696.338	0.44318	0	0	0	105530000	134260000	135580000
P05164	Myeloperoxidase	729	N	KNNIFMSNSYPRDFVNCSTLPALNLASWREA	135.28	2	983.982	-1.4297	0	0	0	110370000	103920000	128350000
P05164	Myeloperoxidase	391	N	LLPFDNLHDDPCLLTNRSARIPCFLAGDTRS	223.5	2	1064.02	0.8167	309310000	124820000	148270000	2859100000	2531000000	2736300000
P05164	Myeloperoxidase	323	N	DCIPFFRSCPACPGSNITIRNQINALTSFVD	158.25	2	718.331	-0.13409	74387000	46681000	50989000	902910000	786840000	926550000
P07711	Cathepsin L1	221	N	ATEESCKYNPKYSVANDTGFVDIPKQEKALM	97.797	2	764.874	0.78498	0	0	0	31792000	39266000	43104000
P11215	Integrin alpha-M	940	N	VYMVVTSHGVSTKYLNFTASENTSRVMQHQY	111.79	2	704.822	-0.046988	0	0	0	58514000	70772000	73389000
P11215	Integrin alpha-M	946	N	SHGVSTKYLNFTASENTSRVMQHQYQVSNLG	111.79	2	704.822	-0.046988	0	0	0	58514000	70772000	73389000
P11215	Integrin alpha-M	1021	N	SHSDFLAELRKAPVVNCSIAVCQRIQCDIPF	184.31	2	802.91	-0.13931	0	0	0	345190000	361600000	320370000
P11215	Integrin alpha-M	978	N	RSLPISLVFLVPVRLNQTVIWDRPQVTFSEN	65.213	4	741.866	1.2497	0	0	0	17756000	18525000	0
P11215	Integrin alpha-M	391	N	GGVFLYTSKEKSTFINMTRVDSDMNDAYLGY	122.19	2	494.736	-0.22917	0	0	0	88352000	31269000	63732000
P11279	Lysosome-associated membrane glycoprotein 1	249	N	ASMGLQLNLTYERKDNTTVTRLLNINPNKTS	179.37	2	469.245	0.38581	261600000	127960000	527660000	2284500000	4003100000	1918200000
P13473	Lysosome-associated membrane glycoprotein 2	275	N	HSTGSCRSHTALLRLNSSTIKYLDFVFAVKN	97.798	2	383.216	0.17156	40942000	46878000	60386000	389240000	449010000	338670000
P13761	HLA class II histocompatibility antigen, DRB1-7 beta chain	48	N	QPRFLWQGKYKCHFFNGTERVQFLERLFYNQ	83.168	3	390.834	-0.32235	47240000	45643000	52820000	616710000	558900000	743230000
P16671	Platelet glycoprotein 4 CD 36	247	N	GKRNLSYWESHCDMINGTDAASFPPFVEKSQ	195.09	3	1059.81	0.2554	0	0	0	5173400	14695000	5603100
P21757	Macrophage scavenger receptor types I and II	249	N	VHLEQEIKGEVKVLNNITNDLRLKDWEHSQT	139.43	2	587.819	-0.36047	0	0	0	36447000	61222000	27394000
P22897	Macrophage mannose receptor 1	1205	N	CVYLDLDGYWKTAHCNESFYFLCKRSDEIPA	199.31	2	840.358	1.8565	1047900000	1143000000	996940000	12834000	50303000	27579000
P30492	HLA class I histocompatibility antigen, B-54 alpha chain	110	N	TQTYRESLRNLRGYYNQSEAGSHTWQTMYGC	112.88	3	985.073	-0.70179	27675000	35501000	0	0	0	0
Q0R326	MHC class II antigen	48	N	__RFLKQDKFECHFFNGTERVRYLHRGIYNQ;QPRFLKQDKFECHFFNGTERVRYLHRGIYNQ	284.68	2	909.394	0.612	126960000	622980000	137050000	1812700000	2076700000	2486500000
Q29882	HLA-DQA1 protein	103	N	IAVLKHNLNIVIKRSNSTAATNEVPEVTVFS	117.55	2	942.46	-1.1807	0	0	0	17730000	43520000	0
Q30065	MHC class II HLA-DQ-alpha chain	81	N	MAVAKHNLNIMIKRYNSTAATNEVPEVTVFS	111.65	2	980.475	0.61826	0	0	0	51785000	62735000	57452000
Q30162	HLA-DRB3 protein	19	N	RPRFLEYSTSECHFFNGTERVRFLERYFHNQ	243.13	3	709.639	-0.061543	33357000	29766000	33785000	735670000	683720000	659140000
Q5KU26	Collectin-12	271	N	DWLKEKVQSLQTLAANNSALAKANNDTLEDM	125.52	2	816.446	0.31276	0	0	0	18538000	18669000	12215000
Q5SU54	HLA class II histocompatibility antigen, DQ beta 1 chain	51	N	__DFVYQFKGMCYFTNGTERVRLVSRSIYNR	107.06	2	677.768	0.58776		8911200	8217800	132650000	125230000	140140000
Q8WTV0	Scavenger receptor class B member 1	102	N	RERGPYVYREFRHKSNITFNNNDTVSFLEYR	70.907	4	577.027	-0.45798	12978000	0	10802000	0	0	0
Q8WTV0	Scavenger receptor class B member 1	108	N	VYREFRHKSNITFNNNDTVSFLEYRTFQFQP	70.907	4	577.027	-0.4411	12978000	0	10802000	0	0	0
Q9Y487	V-type proton ATPase 116 kDa subunit a isoform 2	505	N	SSSHPPAEHKKMVLWNDSVVRHNSILQLDPS	60.434	2	611.313	0.056755	0	0	0	5389800	9099000	0

## Sheet: Table S5
Table S5. MFGM differentially expressed N-glycoproteins involved in cell adhesion molecules pathways.
Proteins	Description	Positions within proteins	Amino acid	Sequence window	Score	Charge	m/z	Mass error [ppm]	Intensity mature milk 1	Intensity mature milk 2	Intensity mature milk 3	Intensity colostrum 1	Intensity colostrum 2	Intensity colostrum 3
A0A0K0KRB6	MHC class I antigen	85	N	AQADRVSLRNLRGYYNQSENGSHTLQRMYGC	47.532	2	878.892	0.043138	0	0	0	0	12975000	10209000
A0A0K0KRB6	MHC class I antigen	89	N	RVSLRNLRGYYNQSENGSHTLQRMYGCDLGP	47.532	2	878.892	0.49727	0	0	0	12757000	12975000	10209000
A0A140EDI1	MHC class II antigen	109	N	IAILNNNLNTLIQRSNHTQAANDPPEVTMFP	51.166	3	662.975	0.45079	0	0	0	12102000	0	21301000
A0A140EDI1	MHC class II antigen	149	N	NTLICHIDRFFPPVLNVTWLCNGEPVTEGVA	66.012	3	1097.89	-2.0572	0	0	0	15808000	110070000	68066000
C5J400	MHC class I antigen	110	N	TQTDRESLRNLRGYYNQSEAGSHTLQSMYGC	117.82	3	956.729	-0.2365	54336000	73223000	72797000	0	0	0
D7RIG7	MHC class II antigen	48	N	RPRFLEYSTGECYFFNGTERVRFLDRYFYNQ	180.7	2	1061.95	-0.00098017	74063000	44571000	55510000	0	0	0
P01903	HLA class II histocompatibility antigen, DR alpha chain	143	N	NVLICFIDKFTPPVVNVTWLRNGKPVTTGVS	161.93	3	477.934	0.34965	0	0	0	4091500000	3850300000	4794400000
P01920	HLA class II histocompatibility antigen, DQ beta 1 chain	51	N	PEDFVYQFKAMCYFTNGTERVRYVTRYIYNR	73.781	2	676.778	-0.15907	0	0	0	32747000	31640000	25976000
P05107	Integrin beta-2	212	N	ECQPPFAFRHVLKLTNNSNQFQTEVGKQLIS	124.45	2	791.883	0.86698		22912000	25775000	321560000	255170000	535430000
P05107	Integrin beta-2	501	N	QGRSSQELEGSCRKDNNSIICSGLGDCVCGQ	127.66	4	814.353	-0.26627	0	0	0	44281000	47907000	50944000
P05107	Integrin beta-2	642	N	SCAECLKFEKGPFGKNCSAACPGLQLSNNPV	144.33	2	916.929	-0.073826	0	0	0	18894000	19791000	17514000
P05107	Integrin beta-2	50	N	ECIESGPGCTWCQKLNFTGPGDPDSIRCDTR	155.08	2	696.338	0.44318	0	0	0	105530000	134260000	135580000
P05362	Intercellular adhesion molecule 1	145	N	NLTLRCQVEGGAPRANLTVVLLRGEKELKRE	140.75	2	501.316	0.061372	0	0	0	6541200	4476300	7419700
P08575	Receptor-type tyrosine-protein phosphatase C	335	N	CLKWKNIETFTCDTQNITYRFQCGNMIFDNK	40.187	2	939.925	-0.14033	0	0	0	0	31015000	29211000
P08575	Receptor-type tyrosine-protein phosphatase C	419	N	HQGVITWNPPQRSFHNFTLCYIKETEKDCLN	114.72	2	716.844	-0.43261	0	0	0	23869000	20267000	15628000
P08575	Receptor-type tyrosine-protein phosphatase C	529	N	ERYHLEVEAGNTLVRNESHKNCDFRVKDLQY	141	3	700.352	-0.7965	0	0	0	0	26287000	10840000
P11215	Integrin alpha-M	940	N	VYMVVTSHGVSTKYLNFTASENTSRVMQHQY	111.79	2	704.822	-0.046988	0	0	0	58514000	70772000	73389000
P11215	Integrin alpha-M	946	N	SHGVSTKYLNFTASENTSRVMQHQYQVSNLG	111.79	2	704.822	-0.046988	0	0	0	58514000	70772000	73389000
P11215	Integrin alpha-M	1021	N	SHSDFLAELRKAPVVNCSIAVCQRIQCDIPF	184.31	2	802.91	-0.13931	0	0	0	345190000	361600000	320370000
P11215	Integrin alpha-M	978	N	RSLPISLVFLVPVRLNQTVIWDRPQVTFSEN	65.213	4	741.866	1.2497	0	0	0	17756000	18525000	0
P11215	Integrin alpha-M	391	N	GGVFLYTSKEKSTFINMTRVDSDMNDAYLGY	122.19	2	494.736	-0.22917	0	0	0	88352000	31269000	63732000
P13761	HLA class II histocompatibility antigen, DRB1-7 beta chain	48	N	QPRFLWQGKYKCHFFNGTERVQFLERLFYNQ	83.168	3	390.834	-0.32235	47240000	45643000	52820000	616710000	558900000	743230000
P20701	Integrin alpha-L	862	N	ELPEESRLLSRALSCNVSSPIFKAGHSVALQ	72.089	2	663.336	0.38586	0	0	0	30332000	22239000	24570000
P23229	Integrin alpha-6	997	N	GLDSKASLILRSRLWNSTFLEEYSKLNYLDI	126.1	2	760.364	-0.16834	0	0	0	16342000	0	19078000
P30492	HLA class I histocompatibility antigen, B-54 alpha chain	110	N	TQTYRESLRNLRGYYNQSEAGSHTWQTMYGC	112.88	3	985.073	-0.70179	27675000	35501000	0	0	0	0
P32942	Intercellular adhesion molecule 3	295	N	ATARADQEGAREIVCNVTLGGERREARENLT	93.623	2	675.334	0.8232	0	0	0	31207000	31044000	20306000
Q0R326	MHC class II antigen	48	N	__RFLKQDKFECHFFNGTERVRYLHRGIYNQ;QPRFLKQDKFECHFFNGTERVRYLHRGIYNQ	284.68	2	909.394	0.612	126960000	622980000	137050000	1812700000	2076700000	2486500000
Q29882	HLA-DQA1 protein	103	N	IAVLKHNLNIVIKRSNSTAATNEVPEVTVFS	117.55	2	942.46	-1.1807	0	0	0	17730000	43520000	0
Q30065	MHC class II HLA-DQ-alpha chain	81	N	MAVAKHNLNIMIKRYNSTAATNEVPEVTVFS	111.65	2	980.475	0.61826	0	0	0	51785000	62735000	57452000
Q30162	HLA-DRB3 protein	19	N	RPRFLEYSTSECHFFNGTERVRFLERYFHNQ	243.13	3	709.639	-0.061543	33357000	29766000	33785000	735670000	683720000	659140000
Q5SU54	HLA class II histocompatibility antigen, DQ beta 1 chain	51	N	__DFVYQFKGMCYFTNGTERVRLVSRSIYNR	107.06	2	677.768	0.58776		8911200	8217800	132650000	125230000	140140000
Q7Z7D3	V-set domain-containing T-cell activation inhibitor 1	112	N	FRGRTAVFADQVIVGNASLRLKNVQLTDAGT	129.05	2	832.449	1.3036	0	0	0	9436400	0	4964700
